1  
2  
3  
4  
5  
6  
7  
8  
9  
10  
11  
12  
13  
14  
15  
16  
17  
18  
19  
20  
21  
22  
23  
24  
25

**Genetic diversity, haplotype analysis, and risk factor assessment of hepatitis  
a virus (HAV) isolates from the West Bank, Palestine during the period  
between 2014 and 2016**

Kamal Dumaidi<sup>1\*</sup>, Hayah Qaraqe<sup>4</sup>, Amer Al-Jawabreh<sup>1,2</sup>, Rasmi Abu-Helu<sup>3</sup>, Fekri Samarah<sup>1</sup>,  
Hanan Al-Jawabreh<sup>2</sup>

<sup>1</sup>Department of Medical Laboratory sciences, Faculty of Allied Health Sciences, Arab  
American University, Palestine

<sup>2</sup> Leishmaniases Research Unit, Jericho, Palestine

<sup>3</sup>Department of Medical Laboratory Sciences, Faculty of Health Professions, Al-Quds  
University, Palestine

<sup>4</sup>Ramallah primary health care, Palestinian Ministry of health

\* Corresponding author

E-mail: [Kamal.dumaidi@aaup.edu](mailto:Kamal.dumaidi@aaup.edu)

26

27

28

## 29 **Abstract:**

30 **Background:** HAV genotypes and its genetic diversity is rarely investigated in our region as well  
31 as worldwide. **Aims:** the aims of the present study were to determine the HAV genotypes and its  
32 risk factors and to investigate the genetic diversity of the HAV isolates in the West bank, Palestine.

33 **Study design:** a cohort of 161 clinically and laboratory confirmed HAV (IgM-positive) cases and  
34 170 IgM negative individuals from all the districts of the West Bank, Palestine during the period  
35 of 2014-2016 were tested for VP3/VP1 junction of the HAV genome using RT-PCR and sequence  
36 analysis. Phylogenetic analysis, genetic diversity and haplotypes analysis were used to characterize  
37 the VP3/VP1 sequences.

38 **Results:** Overall, all the 34 sequences of the HAV was found to be HAV-IB sub-genotype. The  
39 phylogenetic analysis showed four main clusters with cluster III exclusively consisting of 18  
40 Palestinian isolates (18/23-78%) with weak bootstrap values. A high haplotype diversity ( $H_d$ ) and  
41 low nucleotide diversity ( $\pi$ ) were observed. Cluster III showed high number of haplotypes ( $h=8$ ),  
42 but low haplotype (gene) diversity ( $H_d=0.69$ ). A total of 28 active haplotypes with some consisting  
43 of more than one sequence were observed using haplotype network analysis. The Palestinian  
44 haplotypes are characterized by closely related viral haplotypes with one SNV away from each  
45 other which ran parallel to cluster III in the phylogenetic tree. A smaller Palestinian haplotype (4  
46 isolates) was three SNVs away from the major haplotype cluster ( $n=10$ ) and closer to haplotypes  
47 from Iran, Spain, and South Africa. Young age, low level of parent's education, poor hand

48 washing and drinking of un-treated water was considered the major HAV risk factors in the present  
49 study.

50 Conclusion: HAV-IB subgenotype is endemic in Palestine. HAV showed low genetic variation and  
51 nucleotide diversity. Furthermore, haplotype network analysis revealed haplotype variation among  
52 the Palestinian sequences.

53

54 Keywords: Hepatitis A virus, HAV, Hepatitis, Phylogenetic analysis, genetic diversity,

55 Haplotype analysis, Palestine

56

57

58

59

60

61

62

63

64

65

66

67

68

## 69 **Introduction:**

70 Hepatitis A virus (HAV) is “a nonenveloped RNA virus belonging to the family Picornaviridae,  
71 genus Hepatovirus”. HAV is one of the major causes of acute hepatitis worldwide and contributes  
72 to substantial morbidity in both developed and developing countries. Based on HAV genome  
73 sequences, human HAV have been classified into three genotypes, HAV I, II, III and sub-divided  
74 into 6 sub-genotypes (IA, IB, IIA, IIB, IIIA, IIIB) [1].

75

76 Worldwide, the incidence rate of the HAV infection is underestimated due to the clinical  
77 presentations of this disease, since infection at early childhood is largely passed asymptomatic  
78 and/or has mild forms [2]. Recent data showed that the global incidence of HAV is 1.9% with an  
79 estimate of 119 million cases of HAV infection [3, 4]. Approximately, 1.4 million new cases of  
80 HAV reported each year with up to 22% of the cases being hospitalized [5]. Palestine (West Bank,  
81 and Gaza Strip) was classified as an area of very highly endemic area [6]. The Palestinian official  
82 figures put the HAV infection incidence rate as high as 9.5-85 per 100,000 during the period  
83 between 2000 and 2018 [7]. Actual incidence rate is thought to be higher due to underreporting  
84 and asymptomatic cases.

85

86 HAV is transmitted mainly by the fecal-oral route and mainly through drinking and consumption  
87 of contaminated water and food and to a lesser extend from person to person or via blood  
88 transfusion [8-10]. Poor hygiene and sanitation practice reported as the major risk factors for HAV  
89 infection, particularly in low and middle-income countries [11].

90

91 The World Health Organization (WHO) classified the HAV endemicity based on anti-HAV IgG  
92 antibodies as follows: high ( $\geq 90\%$  IgG seroprevalence by 10 years of age), intermediate ( $\geq 50\%$   
93 IgG seroprevalence by 15 years of age,  $< 90\%$  IgG seroprevalence by 10 years of age), and low ( $\geq$   
94  $50\%$  IgG seroprevalence by 30 years of age,  $< 50\%$  IgG seroprevalence by 15 years of age) [12].

95  
96 The viral infection is characterized by asymptomatic or mild in children at early age of life. On the  
97 contrary, adult infections are more frequently occurring with symptoms. In high endemic regions,  
98 HAV infection is acquired in early age of childhood and most adult is positive for anti-HAV IgG  
99 with a life-long immunity, whereas, in low endemic countries, most adult population is susceptible  
100 to infection[3]

101 A recent review investigated and analyzed data based on anti-HAV seroprevalence in the Middle  
102 East and North Africa (MENA) countries reported a gradual shift in the age of HAV infection  
103 from early childhood to late child and adult-hood and indicating a shift towards intermediate  
104 endemicity in these countries in general [6]. However, based on only one orphan, old study conduct  
105 in Gaza between 1995 and 2001, Palestine is still considered a high endemic country. Therefore,  
106 no solid conclusion has been made regarding the current endemicity levels of HAV and vaccine  
107 recommendations in Palestine [13]

108 The aims of this study were to determine the HAV genotypes, the risk factors associated with HAV  
109 infections and to visualize the genealogical relationship between intraspecific HAV individual  
110 genotypes at the population level and exploring the genetic diversity between the HAV sequences.

111

112

113

114

## 115 **Materials and methods:**

### 116 **Study sample:**

117 This case-control, cross-sectional study design, comprised of 161 clinically and laboratory  
118 confirmed HAV (IgM-positive) cases and 170 apparently healthy controls from all the districts of  
119 the West Bank, Palestine during the period of 2014-2016. A special questionnaire was used to  
120 collect demographic and medical data including age, sex, residence, education, working status,  
121 housing details, toilet facilities (flush vs. pit), drinking water sources (pipe-public net sources vs.  
122 collected well or local spring), available used sewage systems (public net system vs. holes),  
123 income, educational level of parents, and other socio-economic data. The study was approved by  
124 the Palestinian Ministry of Health under the reference number 145/1541/2014. Verbal informed  
125 consent was obtained from all patients or their guardians in case of minors. The data was analyzed  
126 anonymously.

127

### 128 **Serological assays:**

129 All serum samples of both the HAV cases and the healthy subjects were tested for HAV IgM  
130 antibodies at the Central Public Health Laboratories, Palestinian Ministry of Health using  
131 commercially IgM capture ELISA (Architect, Abbot-USA, ELISA) with a sensitivity and  
132 specificity of >99% according to the manufacturer's instructions.

133

134

135

136

137 **Molecular assays:**

138 **Extraction of viral RNA:**

139 The HAV viral genome was extracted from 200µl of serum samples, using a QIAamp Mini Elute  
140 Virus spin kit for the viral RNA/DNA extraction (QIAGEN, Germany) according to the  
141 manufacturer's instructions, and kept at -20C until testing.

142 **Reverse transcriptase-polymerase chain reaction (RT-PCR):**

143 The HAV genomes of 136 serum samples from IgM- positive patients were amplified using two  
144 primers targeting the VP3/VP1 region of the viral genome as described previously by Lee *et al.*,  
145 (2012) [14]. Briefly, the synthesis of the cDNA and the RT-PCR was carried out in 25µl reaction  
146 mixture containing 4µl viral RNA extraction, 10U Reverse transcriptase (AMV), 10pmol of each  
147 the forward and the reverse primers: (HAV1; 5' - GCTCCTCTTTATCATGCTATGGAT-3' and  
148 rHAV2; 5'-CAGGAAATGTCTCAGGTACTTTC-3') and 12.5µl of PCR Reddy master mix  
149 (Thermo Scientific). PCR products (6µl) were loaded onto a 2% agarose gel, electrophoresed, and  
150 stained with ethidium bromide for band visualization at an expected length of 244bp using the Gel  
151 Doc System 2000 (Bio-Rad Laboratories-Segarate, Milan, Italy). Of the 136 PCR-positive sample,  
152 34 representative PCR amplicons were selected randomly for sequence analysis. The PCR  
153 amplicons of the 34 samples were purified and sequenced. The HAV identity search was conducted  
154 using GenBank Basic Local Alignment Search Tool (BLAST)  
155 <http://www.ncbi.nlm.nih.gov/BLAST/Blast.cgi>.

156

## 157 **Genetic diversity analysis**

158 The 23 sequences generated by the study and the 28 sequences retrieved from the Genbank were  
159 aligned using the MEGA version X [15]. Maximum likelihood phylogenetic tree with 1000  
160 iterations for bootstrapping was constructed using MEGA version X.

161 Population nucleotide diversity indices such as nucleotide diversity per site ( $\pi$ ), average number  
162 of nucleotide differences ( $k$ ), mean genetic diversity ( $H_d$ ), genetic differentiation parameters ( $F_{st}$   
163 and  $N_m$ ) and neutrality tests including Tajima's  $D$  and Fu Li's  $F$  test were calculated using DnaSP  
164 ver. 6.12.03 [16]. The PopArt 1.7 [17] was used to construct a median-joining haplotype network  
165 analysis based on country of source of viral genomes to estimate relationship between haplotypes  
166 using nexus input files produced by DnaSP version 6.12.03. Haplotype network analysis was  
167 colored and edited using a free open-source vector graphics editor called Inkscape 1.0  
168 ([www.inkscape.org](http://www.inkscape.org)). The haplotype analysis was double checked by reconstructing the median  
169 joining tree using Network 10 (<https://www.fluxusengineering.com/>) with RDP input file  
170 generated by DnaSP ver. 6.12.03 and default parameters of the software including epsilon value  
171 of zero and the connection cost method of Röhl for genetic distance calculation [17]. Greedy FHP  
172 method for the genetic distance calculation was also used [18].

## 173 **Risk assessment analysis**

174 The EpiInfo, a free CDC statistical package, was used to analyze data. Odds ratio, 95% confidence  
175 interval, and Fisher's exact test were used to assess the risk factors of HAV infection. P-value was  
176 considered significant when less than 0.05.

177



178

## 179 **Results**

### 180 **Characteristics of study population**

181 A total of 331 individuals were included in the study with a median age of 15 years and a 1:1  
182 female-to-male ratio. The HAV case group were from all 11 Palestinian districts in the West Bank-  
183 Palestine with 35% (56/161) from the Al-Khalil district. All the 34 sequenced samples were shown  
184 to be of HAV-IB genotype. Twenty-three sequences were deposited in the gene Bank (Table 1)

185

186 Table 1. Demographic data of the sequenced HAV patient samples

| Accession No. | Sample code/year of isolation | genotype | Age (yr) | District  |
|---------------|-------------------------------|----------|----------|-----------|
| MN744241      | 1B/Pal-2014                   | HAV-IB   | 28       | Bethlehem |
| MN744242      | 11B/Pal-2014                  | HAV-IB   | 15       | Bethlehem |
| MN744243      | 104S/Pal-2016                 | HAV-IB   | 6        | Salfit    |
| MN744244      | 41K/Pal-2015                  | HAV-IB   | 14       | Al-Khalil |
| MN744245      | 44Q/Pal-2015                  | HAV-IB   | 14       | Qalqilia  |
| MN744246      | 46N/Pal-2015                  | HAV-IB   | 25       | Nablus    |
| MN744247      | 73B/Pal-2015                  | HAV-IB   | 2        | Bethlehem |
| MN744248      | 75B/Pal-2015                  | HAV-IB   | 16       | Bethlehem |
| MN744249      | 86K/Pal-2016                  | HAV-IB   | 7        | Al-Khalil |
| MN744250      | 98T/Pal-2016                  | HAV-IB   | 9        | Tulkarem  |
| MN744251      | 6B/Pal-2016                   | HAV-IB   | 8        | Bethlehem |
| MN744252      | 8K/Pal-2014                   | HAV-IB   | 6        | Al-Khalil |
| MN744253      | 16K/Pal-2015                  | HAV-IB   | 4        | Al-Khalil |
| MN744254      | 25K/Pal-2016                  | HAV-IB   | 7        | Al-Khalil |
| MN744255      | 26K/Pal-2016                  | HAV-IB   | 8        | Al-Khalil |
| MN744256      | 32K/Pal-2016                  | HAV-IB   | 8        | Al-Khalil |
| MN744257      | 33K/Pal-2016                  | HAV-IB   | 13       | Al-Khalil |
| MN744258      | 44Q/Pal-2016                  | HAV-IB   | 14       | Qalqilia  |
| MN744259      | 60R/Pal-2016                  | HAV-IB   | 19       | Ramallah  |
| MN744260      | 66K/Pal-2016                  | HAV-IB   | 8        | Al-Khalil |
| MN744261      | 88K/Pal-2016                  | HAV-IB   | 12       | Al-Khalil |
| MN744262      | 89N/Pal-2016                  | HAV-IB   | 5        | Al-Khalil |
| MN744263      | 69T/Pal-2015                  | HAV-IB   | 21       | Tulkarem  |

187

188

189

## 190 **Phylogenetic analysis**

191 Phylogenetic tree of the VP3/ VP1 junction region of HAV genome was conducted using the 23  
192 HAV sequences from strains isolated from Palestinian patients along with 28 sequences retrieved  
193 from the Genbank. The phylogenetic tree showed four main clusters with cluster III exclusively  
194 consisting of 18 Palestinian isolates. Cluster I consisted of 12 strains, of which four were isolated  
195 in Palestine (Figure 1). However, the four clusters were weakly supported by bootstrap values (Fig  
196 1).

**Figure 1.** Consensus Maximum Likelihood phylogenetic tree (1000 replicates) based on VP3/VP1 region. The percentage of trees in which the associated taxa clustered together is shown next to the branches. The branch labels in red represent the study sequences, while the black labels represent the sequences retrieved from the gene bank. The different color branches depict different clades. The tree is drawn to scale, with branch lengths measured in the number of substitutions per site. This analysis involved 51 nucleotide sequences conducted in n MEGA X [15, 19].

## 197 **Genetic differentiation and Diversity**

198 Population nucleotide diversity indices and neutrality tests were calculated for the VP3/VP1  
199 junction region of the HAV genome, based on phylogenetic clusters (Tables 2 and 3). A high  
200 haplotype diversity ( $H_d$ ) and low nucleotide diversity ( $\pi$ ) were observed (Table 2). The total  
201 haplotype (gene) diversity ( $H_d$ ) for the 23 HAV sequences from Palestine and 28 from the  
202 Genbank was  $0.93 \pm 0.07$ . At the same time, the total nucleotide diversity per site ( $\pi$ ) was  $0.01 \pm$

203 0.002, confirming low genetic diversity in the HAV study bulk. The average number of nucleotide  
 204 differences between any two sequences (k) was 1.7 which is very low. The DnaSP ver. 6.12.03  
 205 estimated the total number of haplotypes for the four probable cluster at 24 with highest in cluster  
 206 I (h=9) (Table 2). Cluster III is composed of 18 isolates, exclusively Palestinian isolates, while  
 207 one third of cluster I was from Palestine. The Palestinian cluster (III) showed high number of  
 208 haplotypes (h=8), but lowest haplotype-to-sequence (h:n) ratio (0.4:1), compared to the other  
 209 clusters and lowest haplotype (gene) diversity (Hd=0.69). Haplotype diversity (H<sub>d</sub>), and number  
 210 of segregating (polymorphic) sites (S) were highest in cluster I which included Palestinian strains  
 211 (4/12) along with those from other countries (Figure 1); confirming the highest level of genetic  
 212 diversity between all probable clusters. Nucleotide diversity ( $\pi$ ) is equally low in all clusters (0.01±  
 213 0.002). The average number of nucleotide differences (k) is also equal in all clusters except cluster  
 214 I. Tajima's D and Fu-Li's F tests were negative for cluster I, II, and III. The negative values of  
 215 Tajima's D and Fu-Li's, though not statistically different from neutral expectations supported the  
 216 low population differentiation. Cluster I and III had relatively the highest negative values for  
 217 Tajima's D and Fu'Li's F statistics. However, it did not depart significantly from neutrality  
 218 (P>0.01) (Table 2). Cluster IV recorded a positive Tajima's D value (0.17), but showing no  
 219 statistically significant departure from neutrality (P>0.01) (Table 2).

220 Table 2. Haplotype/nucleotide diversity and neutrality tests of the four probable clusters of HAV as  
 221 calculated for the VP3/VP1 gene

222 Table 2.

| Cluster      | Haplotype- nucleotide diversity |           |               |                   |                    |            |           | Neutrality tests |                |
|--------------|---------------------------------|-----------|---------------|-------------------|--------------------|------------|-----------|------------------|----------------|
|              | n                               | h         | h:n           | Hd±SD             | $\pi$ ±SD          | K          | S         | Tajima's D       | Fu-Li's F      |
| Cluster-I    | 12                              | 9         | 0.8:1         | 0.90± 0.08        | 0.01± 0.002        | 3.3        | 14        | -1.19            | -1.59          |
| Cluster -II  | 7                               | 4         | 0.6:1         | 0.71± 0.18        | 0.01± 0.002        | 1.1        | 3         | -0.30            | -0.51          |
| Cluster-III  | 18                              | 8         | 0.4:1         | 0.69± 0.13        | 0.01± 0.001        | 1.1        | 7         | -1.41            | -1.72          |
| Cluster-IV   | 7                               | 4         | 0.6:1         | 0.81± 0.10        | 0.01± 0.002        | 1.1        | 3         | 0.17             | -0.03          |
| <b>Total</b> | <b>44</b>                       | <b>24</b> | <b>0.5: 1</b> | <b>0.93± 0.07</b> | <b>0.03± 0.002</b> | <b>3.2</b> | <b>23</b> | <b>-2.63*</b>    | <b>-5.16**</b> |

223 n: Number of sequences, h: Number of Haplotypes, Hd: Haplotype (gene) diversity,  $\pi$ : Nucleotide diversity (per  
 224 site)[20], K: Average number of nucleotide differences between two randomly chosen sequences from within in the  
 225 population[21], S: Number of variable/segregating sites.(1 outgroup, 4 have no clear cluster). \*: P<0.01. \*\*: P<0.02

226

227

228 Inter-population pairwise genetic distance (Fst) between the four HAV probable populations  
 229 ranged from 0.46 to 0.65 with Nm value from 0.11 to 0.12 (Table 2) indicating genetic  
 230 differentiation and minimal migration and gene flow (Nm) between subpopulations. Fst for cluster  
 231 III which is purely Palestinian compared to clusters I, II and IV were highest (0.52, 0.52 and 0.63,  
 232 respectively). However, genetic differentiation among subpopulation is generally low especially  
 233 between clusters I and IV (Gst=0.073). The genetic differentiation between clusters is low as  
 234 supported by other low genetic differentiation parameters including Gst, Da, and Dxy (Table 3).

235

236 Table 3: Gene flow and genetic differentiation indices between the four HAV probable clusters  
 237 estimated from VP3/VP1 gene sequences

238

| Pop 1       | Pop 2        | Fst  | Nm   | Kxy  | Dxy   | Gst   | Da    |
|-------------|--------------|------|------|------|-------|-------|-------|
| Cluster-I   | Cluster-II   | 0.46 | 0.12 | 4.10 | 0.021 | 0.098 | 0.009 |
| Cluster -I  | Cluster -III | 0.52 | 0.12 | 4.75 | 0.024 | 0.108 | 0.013 |
| Cluster-I   | Cluster-IV   | 0.52 | 0.12 | 4.61 | 0.023 | 0.073 | 0.011 |
| Cluster-II  | Cluster-III  | 0.52 | 0.12 | 2.41 | 0.012 | 0.147 | 0.007 |
| Cluster-II  | Cluster-IV   | 0.53 | 0.12 | 2.45 | 0.012 | 0.135 | 0.007 |
| Cluster-III | Cluster-IV   | 0.63 | 0.11 | 3.19 | 0.016 | 0.136 | 0.011 |

239 Fst: Wright's F-statistics, pairwise genetic distance[22], Nm: Gene flow and population migration among populations  
 240 [22, 23], Kxy: Average proportion of nucleotide differences between populations. Dxy: The average number of  
 241 nucleotide substitutions per site between populations[20], Da: The number of net nucleotide substitutions per site  
 242 between populations [20], Gst: Genetic differentiation index based on the frequency of haplotypes [24].

243

244

245

246

247

248

249

## 250 **Haplotype network analysis:**

Figure 2. (a) Median-joining haplotype network of HAV viral haplotypes constructed using PopArt 1.7. (b) Median-joining haplotype network reconstructed using Network 10. The network analysis included 28 multiple viral haplotypes of HAV from 2014-2018. Each circle represents a unique haplotype, color represents country of genome origin, and the size of the circle is proportional to number of viral genomes included. The numbers in bracket in (a) represent the number of single nucleotide variations (SNVs) between haplotypes. The lines on the branches in (b) represent the mutated position with one line per mutation

251

252 The median-joining haplotype network constructed by PopArt 1.7 using the 49 taxa produced a  
253 total of 28 active haplotypes with some of which consisting of more than one sequence (2-10  
254 sequences) (Figure 2a). Peripheral haplotypes mainly had single nucleotide variation (SNV) from  
255 central haplotypes (Figure 4a). The Palestinian haplotypes (red circles) are characterized by closely  
256 related viral haplotypes with one SNV away from each other. The Palestinian haplotypes (red)  
257 formed a cluster of nodes (n=9) surrounding a major node (haplotype) consisting of 10 identical  
258 HAV sequences which ran parallel to cluster III in the phylogenetic tree (Figure 1). A smaller  
259 Palestinian HAV haplotype consisting of four sequences was three SNVs away from the major  
260 haplotype cluster (n=10) and closer to haplotypes from Iran, Spain, and South Africa which again  
261 matches cluster I in the phylogenetic tree.

262 The reconstruction of median joining haplotype network analysis using Network 10 revealed  
263 similar haplotype network analysis profile by both distance calculation methods, the Röhl method  
264 and the Greedy HPF method (Figure 2b).

265

## 266 **Risk Assessment**

267 The overall, 331 participants (161 cases and 170 health individuals) were analyzed for the HAV  
268 risk factors (Table 6). Young age as a demographic variable was found to be significantly  
269 associated with HAV infection (OR=7.16, CI: 4.41-11.63, P<0.0001). Level of parents' education  
270 was the only socioeconomic risk factor significantly associated with HAV infections (OR=4.72,  
271 CI: 2.64-8.41, P < 0.0001). Furthermore, treating drinking water and washing hands before meal  
272 as hygiene and behavior risk variables were found to be statistically significant (R=0.11, CI: 0.01-  
273 0.965, P< 0.03 and R= 0.24, C:0.15-0.39, P<0.0001) (Table 4).

274

275

276

277

278

279

280

281

282

283

284

285

286

287

288

289

290

291

292

293

294

295

296  
297  
298  
299  
300  
301  
302  
303 Table 4. Demographic data, clinical history and the risk factors associated with acquiring HAV  
304 infection in the study group; demography, SES, and hygiene and behavior of the HAV cases and  
305 controls.  
306  
307 Table 4.  
308

| Variable                          | Category    | Case | Control | Total | OR (CI 95%)       | P-value   |
|-----------------------------------|-------------|------|---------|-------|-------------------|-----------|
| <b>Demography</b>                 |             |      |         |       |                   |           |
| Sex                               | Male        | 92   | 85      | 176   | 1.32 (0.85-2.03)  | 0.22      |
|                                   | Female      | 69   | 85      | 154   |                   |           |
|                                   | Total       | 161  | 170     | 331   |                   |           |
| Age                               | <14 yrs     | 111  | 42      | 153   | 7.16 (4.41-11.63) | <0.0001*  |
|                                   | >14 yrs     | 48   | 130     | 178   |                   |           |
|                                   | Total       | 159  | 172     | 331   |                   |           |
| <b>Socioeconomic status (SES)</b> |             |      |         |       |                   |           |
| Level of education                | ≤12 yrs     | 141  | 108     | 249   | 4.72 (2.64-8.41)  | <0.0001*  |
|                                   | >12 yrs     | 18   | 65      | 83    |                   |           |
|                                   | Total       | 159  | 173     | 332   |                   |           |
| Monthly income                    | <1450       | 15   | 12      | 27    | 1.41 (0.64-3.11)  | 0.43      |
|                                   | >1450       | 143  | 161     | 158   |                   |           |
|                                   | Total       | 158  | 173     | 331   |                   |           |
| <b>Hygiene and Behavior</b>       |             |      |         |       |                   |           |
| Toilette, location                | In-house    | 154  | 172     | 326   | 0.18 (0.02-155)   | 0.10      |
|                                   | In yard     | 5    | 1       | 6     |                   |           |
|                                   | Total       | 159  | 173     | 332   |                   |           |
| Wash hand                         | Yes         | 152  | 166     | 318   | 1.14 (0.30-4.34)  | 1         |
|                                   | No          | 4    | 5       | 9     |                   |           |
|                                   | Total       | 156  | 171     | 327   |                   |           |
| Livestock at home                 | Yes         | 49   | 61      | 110   | 0.76 (0.48-1.18)  | 0.25      |
|                                   | No          | 87   | 75      | 162   |                   |           |
|                                   | Total       | 136  | 136     | 272   |                   |           |
| Toilette link                     | Septic tank | 72   | 77      | 149   | 1.03 (0.66-1.59)  | 0.62      |
|                                   | No          | 87   | 96      | 183   |                   |           |
|                                   | Total       | 159  | 173     | 332   |                   |           |
| Treat drinking water              | Yes         | 1    | 8       | 9     | 0.11 (0.01-0.965) | 0.03**    |
|                                   | No          | 135  | 128     | 263   |                   |           |
|                                   | Total       | 136  | 136     | 272   |                   |           |
| Swimming                          | Yes         | 58   | 75      | 133   | 0.74 (0.47-1.15)  | 0.21      |
|                                   | No          | 101  | 97      | 198   |                   |           |
|                                   | Total       | 159  | 172     | 331   |                   |           |
| Wash hands before meal            | Always      | 35   | 93      | 128   | 0.24 (0.15-0.39)  | <0.0001** |
|                                   | Sometimes   | 124  | 80      | 204   |                   |           |
|                                   | Total       | 159  | 206     | 332   |                   |           |
| Eat leafy vegetables              | Yes         | 102  | 92      | 194   | 1.64 (0.99-2.67)  | 0.06      |
|                                   | No          | 34   | 44      | 78    |                   |           |
|                                   | Total       | 146  | 136     | 272   |                   |           |
| Eat in restaurants                | Yes         | 90   | 110     | 200   | 0.72 (0.46-1.13)  | 0.17      |
|                                   | No          | 69   | 61      | 130   |                   |           |
|                                   | Total       | 159  | 171     | 330   |                   |           |

309 \*: statistically significant risk factor. \*\*: statistically significant protective factor

310

311

312

## 313 **Discussion:**

314 To the best of our knowledge, the present study is the first to use genetic diversity indices and  
315 haplotype analysis networking to analyze HAV variation from clinical sample. All of the 34  
316 sequenced samples in the present study proved to be of the sub-genotype IB, which is the  
317 predominantly circulating genotype in the Mediterranean region from both clinical and  
318 environmental samples such as Spain, Jordan, Egypt and Turkey [25-28].

319 The maximum likelihood phylogenetic tree of the 23 HAV-IB sequences in the present study with  
320 other 28 HAV sequences retrieved from the gene bank, identified at least four clusters, but with  
321 weak bootstrap values. Although most (78%) of the samples isolated in 2015 and 2016  
322 distinctively clustered in clade III, four Palestinian HAV-IB samples isolated between the years  
323 2014 and 2016 intermixed with other HAV-IB isolates from Turkey, Spain, South African, Iran  
324 and Uruguay in clusters I. One isolate clustered uniquely by its own (Figure 1). Similar results  
325 had been described in a Bulgarian study which reported the splitting of HAV-IB into several  
326 clusters with few cases intermixing between Bulgarian and European isolates while others formed  
327 a unique Bulgarian cluster [4]. Furthermore, Wang *et al.*, (2013) delineated HAV isolates from the  
328 same area and during the same period to have clustered to several closely related lineages with  
329 low genetic diversity, suggesting either they possess a fitness advantage in the region, or an  
330 endemic transmission of closely related strains circulating in the neighboring regions [29]. The  
331 four Palestinian isolates in cluster I-and the lonely clustering isolate may have originated from  
332 travelers or food imported from HAV endemic areas, whereas, cluster III that consisted of purely



333 Palestinian isolates indicates endemic HAV genotypes in Palestine. In addition to the weak  
334 bootstrap values, the genetic diversity indices such as total nucleotide diversity per site ( $\pi$ ), average  
335 number of nucleotide differences between any two sequences ( $k$ ), and neutrality indices supported  
336 the low population nucleotide diversity among HAV sequences.

337 The negative values of Tajima's  $D$  and Fu-Li's  $F$  indicate the amount of nucleotide variation  
338 observed ( $\pi$ ) between HAV isolates is much less than expected ( $\theta$ ) which means low nucleotide  
339 variation. HAV clusters I and III with relatively high negative values for Tajima's  $D$  and Fu-Li's  
340  $F$  statistics and low  $H_d$  (0.69) may have been subjected to recent population expansion or selection  
341 variation events that reduce genetic diversity such as selective sweep or bottleneck. This low  
342 variation between HAV clusters was further supported by the equal values of nucleotide diversity  
343 ( $\pi$ ) in almost all cluster and the same applied to the average number of nucleotide differences ( $k$ ).

344 On the other hand, signs of polymorphism and nucleotide variation can be discerned in cluster IV  
345 which had positive Tajima's  $D$  value (0.17). This cluster consisting of European HAV isolates can  
346 be argued to have begun a balancing selection where cluster IV is on the brink of developing into  
347 a distinct population (Table 1). Such data had been supported by recent published data from  
348 Bulgarian study which showed that the sequence analysis of HAV- IA subgenotypes were either  
349 identical or showed very few (1 to 4) nucleotide variations [30].

350 The fixation indices such as  $F_{st}$  confirmed genetic differentiation between the four HAV probable  
351 population with minimal migration among population reducing gene flow ( $Nm$ ) between the  
352 cluster ( $F_{st} > 0.25$  and  $Nm < 1$ ).

353 The total number of haplotypes produced by the haplotype analysis was 28. Indeed, several  
354 haplotypes (4-9) were observed in each phylogroup. This proves that despite low genetic diversity  
355 indices, haplotypes networking can be a good surrogate for unraveling the diversity among

356 monomorphic population and even within the same phylogenetic group which is due to the fact  
357 that haplotype network analysis is based on detecting the single nucleotide variation (SNV) among  
358 studied sequences making it a powerful tool to detect genetic and haplotype variation.  
359 Interestingly, our study showed that the number of haplotypes in the clusters containing the  
360 Palestinian isolates, I and III, were the highest with  $h=9$  and  $8$ , respectively (Table 2). The high  
361 number of haplotypes in cluster III indicate that the Palestinian HAV isolates, despite being from  
362 a geographically confined area, are more diverse and heterogeneous than those from Europe  
363 (cluster IV). However, despite the high number of haplotypes among our isolates, in comparison  
364 to the European cluster, the nucleotides variation is very low (1-2nts) which might be the result of  
365 a common origin coming from recent population expansion or selective sweep or genetic  
366 bottleneck.

367 Despite the high number of Palestinian haplotypes (red circles), but they are characterized by  
368 closely related viral haplotypes with 1-2 SNVs away from each other reflecting how close these  
369 haplotypes are. Cluster I is the most heterogeneous as it had the highest number of haplotypes  
370 ( $h=9$ ), the haplotypes  $\geq 2$  SVNs apart from each other, and representing isolates from Asia, Europe,  
371 South America and Africa.

372 Moreover, the identical median-joining haplotype networks constructed by PopArt 1.7 and  
373 Network 10.0 (Figure 3) supported the low-bootstrap value phylogroups created by the maximum  
374 likelihood phylogenetic tree using MEGA version X (Figure 2) and running parallel with genetic  
375 and haplotype diversity parameters calculated by DnaSP ver. 6.12.03.

376 It is noteworthy, that even though a variety of genetic and haplotype diversity indices and several  
377 genetic differentiation parameters were calculated and networks and trees constructed, some

378 variation may have been missed due to different reasons such as missing nucleotide during  
379 sequencing and insufficient number of sequences from study area and from Genbank.

380 In this study, young age, low level of parent's education significantly increased the odds of HAV  
381 infection ( $OR > 1$ ,  $P < 0.05$ ), while the significantly low odds ( $OR < 1$ ,  $P < 0.05$ ) with the increase of  
382 hand washing before meal and treating of drinking water indicated the decrease of HAV infection  
383 suggesting these two variables are protective factors. On the contrary, Koroglu et al., (2017)  
384 reported that water and sanitation were not significant risk factors for HAV infection, whereas,  
385 gross domestic product (GDP), gross national income (GNI), and the human development index  
386 (HDI) were all highly associated with HAV infection rate in the Middle East and North Africa [6].  
387 In addition, Hayajneh et al., (2015), reported that the incidence rate of HAV infection in Jordan  
388 decreased due to increase in level of maternal education, use of processed bottled drinking water  
389 and good sanitation practice [31-33]. Our results were in congruence with other studies that  
390 reported personal hygiene (hand washing before food preparation, cooking, eating and after  
391 defecation), living on crowded campuses, drinking unprocessed water, were the major risk factors  
392 of HAV infections [34-37]. In addition, political conflict in Palestine and the occupation of the  
393 West Bank and Gaza Strip, Palestine as well as the wars in neighboring Middle East countries  
394 usually, disturb the environmental and health condition and commonly increase the spreading of  
395 infectious disease outbreaks, including HAV, not only in source countries but also in neighboring  
396 regions that host refugees.

397 **In conclusion**, this study confirmed that based on VP3/VP1 junction region of the HAV genome;  
398 HAV possesses low genetic variation and nucleotide diversity, albeit haplotype network analysis  
399 revealed haplotype variation among the Palestinian sequences. Future studies based on multiple  
400 targets or full genome sequences are expected to give full picture on the genetic and haplotype

401 variation. Our study reconfirmed that age and parent's level of education as HAV risk factors,  
402 while hand washing and treating drinking water as protective factors.

403 **References:**

- 404 1. Franco E, Meleleo C, Serino L, Sorbara D, Zaratti L. Hepatitis A: Epidemiology and prevention in  
405 developing countries. *World J Hepatol.* 2012;4(3):68-73. Epub 2012/04/11. doi: 10.4254/wjh.v4.i3.68.  
406 PubMed PMID: 22489258; PubMed Central PMCID: PMC3321492.
- 407 2. Seo JY, Choi BY, Ki M, Jang HL, Park HS, Son HJ, et al. Risk factors for acute hepatitis A infection  
408 in Korea in 2007 and 2009: a case-control study. *J Korean Med Sci.* 2013;28(6):908-14. Epub 2013/06/19.  
409 doi: 10.3346/jkms.2013.28.6.908. PubMed PMID: 23772157; PubMed Central PMCID:  
410 PMC3678009.
- 411 3. Jacobsen KH, Wiersma ST. Hepatitis A virus seroprevalence by age and world region, 1990 and  
412 2005. *Vaccine.* 2010;28(41):6653-7. Epub 2010/08/21. doi: 10.1016/j.vaccine.2010.08.037. PubMed  
413 PMID: 20723630.
- 414 4. Cella E, Golkocheva-Markova EN, Trandeva-Bankova D, Gregori G, Bruni R, Taffon S, et al. The  
415 genetic diversity of hepatitis A genotype I in Bulgaria. *Medicine (Baltimore).* 2018;97(3):e9632. Epub  
416 2018/03/06. doi: 10.1097/MD.00000000000009632. PubMed PMID: 29504993; PubMed Central PMCID:  
417 PMC5779762.
- 418 5. Fiore AE, Wasley A, BP. B. Advisory Committee on Immunization Practices (ACIP), Prevention of  
419 hepatitis A through active or passive immunization: recommendations of the Advisory Committee on  
420 Immunization Practices (ACIP). CDC, 2006.
- 421 6. Koroglu M, Jacobsen KH, Demiray T, Ozbek A, Erkorkmaz U, Altindis M. Socioeconomic indicators  
422 are strong predictors of hepatitis A seroprevalence rates in the Middle East and North Africa. *J Infect  
423 Public Health.* 2017;10(5):513-7. Epub 2017/02/07. doi: 10.1016/j.jiph.2016.09.020. PubMed PMID:  
424 28162965.
- 425 7. PalestineMinistryofHealth. Health Annual Report. Ramalla-Palestine: 2018.
- 426 8. Bellou M, Kokkinos P, Vantarakis A. Shellfish-borne viral outbreaks: a systematic review. *Food  
427 Environ Virol.* 2013;5(1):13-23. Epub 2013/02/16. doi: 10.1007/s12560-012-9097-6. PubMed PMID:  
428 23412719.
- 429 9. Maunula L, Kaupke A, Vasickova P, Soderberg K, Kozyra I, Lazic S, et al. Tracing enteric viruses in  
430 the European berry fruit supply chain. *Int J Food Microbiol.* 2013;167(2):177-85. Epub 2013/10/19. doi:  
431 10.1016/j.ijfoodmicro.2013.09.003. PubMed PMID: 24135674.
- 432 10. Hughes JA, Fontaine MJ, Gonzalez CL, Layon AG, Goodnough LT, Galel SA. Case report of a  
433 transfusion-associated hepatitis A infection. *Transfusion.* 2014;54(9):2202-6. Epub 2014/04/03. doi:  
434 10.1111/trf.12648. PubMed PMID: 24689888.
- 435 11. Heathcote J, Elewaut A, Fedail S, Gangl A, Hamid S, Shah M, et al. Management of acute viral  
436 hepatitis Milwaukee, USA2007 [cited 2020]. Available from:  
437 [https://www.worldgastroenterology.org/guidelines/global-guidelines/management-of-acute-viral-](https://www.worldgastroenterology.org/guidelines/global-guidelines/management-of-acute-viral-hepatitis/acute-viral-hepatitis-english)  
438 [hepatitis/acute-viral-hepatitis-english](https://www.worldgastroenterology.org/guidelines/global-guidelines/management-of-acute-viral-hepatitis/acute-viral-hepatitis-english)
- 439 12. WorldHealthOrganization. WHO position paper on hepatitis A vaccines. *Weekly epidemiological  
440 record.* 2012;87(28-29):261-76.
- 441 13. Yassin K, Awad R, Tebi A, Queder A, Laaser U. The epidemiology of hepatitis A infection in  
442 Palestine: a universal vaccination programme is not yet needed. *Epidemiol Infect.* 2001;127(2):335-9.  
443 Epub 2001/11/06. doi: 10.1017/s0950268801005970. PubMed PMID: 11693511; PubMed Central  
444 PMCID: PMC3321492.

- 445 14. Lee H, Jeong H, Yun H, Kim K, Kim JH, Yang JM, et al. Genetic analysis of hepatitis A virus strains  
446 that induced epidemics in Korea during 2007-2009. *Journal of clinical microbiology*. 2012;50(4):1252-7.  
447 Epub 2012/01/13. doi: 10.1128/jcm.01114-11. PubMed PMID: 22238447; PubMed Central PMCID:  
448 PMCPMC3318560.
- 449 15. Kumar S, Stecher G, Li M, Knyaz C, Tamura K. MEGA X: Molecular Evolutionary Genetics Analysis  
450 across Computing Platforms. *Mol Biol Evol*. 2018;35(6):1547-9. Epub 2018/05/04. doi:  
451 10.1093/molbev/msy096. PubMed PMID: 29722887; PubMed Central PMCID: PMCPMC5967553.
- 452 16. Rozas J, Ferrer-Mata A, Sanchez-DelBarrio JC, Guirao-Rico S, Librado P, Ramos-Onsins SE, et al.  
453 DnaSP 6: DNA Sequence Polymorphism Analysis of Large Data Sets. *Mol Biol Evol*. 2017;34(12):3299-302.  
454 Epub 2017/10/14. doi: 10.1093/molbev/msx248. PubMed PMID: 29029172.
- 455 17. Bandelt HJ, Forster P, Rohl A. Median-joining networks for inferring intraspecific phylogenies.  
456 *Mol Biol Evol*. 1999;16(1):37-48. Epub 1999/05/20. doi: 10.1093/oxfordjournals.molbev.a026036.  
457 PubMed PMID: 10331250.
- 458 18. Foulds LR, Hendy MD, Penny D. A graph theoretic approach to the development of minimal  
459 phylogenetic trees. *J Mol Evol*. 1979;13(2):127-49. Epub 1979/07/18. doi: 10.1007/BF01732868.  
460 PubMed PMID: 480370.
- 461 19. Tamura K, Nei M. Estimation of the number of nucleotide substitutions in the control region of  
462 mitochondrial DNA in humans and chimpanzees. *Mol Biol Evol*. 1993;10(3):512-26. Epub 1993/05/01.  
463 doi: 10.1093/oxfordjournals.molbev.a040023. PubMed PMID: 8336541.
- 464 20. Nei M. *Molecular Evolutionary Genetics*. New York: Columbia University Press; 1987.
- 465 21. Tajima F. Evolutionary relationship of DNA sequences in finite populations. *Genetics*.  
466 1983;105(2):437-60. Epub 1983/10/01. PubMed PMID: 6628982; PubMed Central PMCID:  
467 PMCPMC1202167.
- 468 22. Wright S. The genetical structure of populations. *Ann Eugen*. 1951;15(4):323-54. Epub  
469 1951/03/01. doi: 10.1111/j.1469-1809.1949.tb02451.x. PubMed PMID: 24540312.
- 470 23. Hudson RR, Slatkin M, Maddison WP. Estimation of levels of gene flow from DNA sequence data.  
471 *Genetics*. 1992;132(2):583-9. Epub 1992/10/01. PubMed PMID: 1427045; PubMed Central PMCID:  
472 PMCPMC1205159.
- 473 24. Nei M. Analysis of gene diversity in subdivided populations. *Proc Natl Acad Sci U S A*.  
474 1973;70(12):3321-3. Epub 1973/12/01. doi: 10.1073/pnas.70.12.3321. PubMed PMID: 4519626;  
475 PubMed Central PMCID: PMCPMC427228.
- 476 25. Melhem NM, Talhouk R, Rachidi H, Ramia S. Hepatitis A virus in the Middle East and North Africa  
477 region: a new challenge. *J Viral Hepat*. 2014;21(9):605-15. Epub 2014/07/22. doi: 10.1111/jvh.12282.  
478 PubMed PMID: 25040644.
- 479 26. D'Andrea L, Perez-Rodriguez FJ, de Castellarnau M, Manzanares S, Lite J, Guix S, et al. Hepatitis A  
480 virus genotype distribution during a decade of universal vaccination of preadolescents. *Int J Mol Sci*.  
481 2015;16(4):6842-54. Epub 2015/03/31. doi: 10.3390/ijms16046842. PubMed PMID: 25815599; PubMed  
482 Central PMCID: PMCPMC4424991.
- 483 27. Cristina J, Costa-Mattioli M. Genetic variability and molecular evolution of hepatitis A virus. *Virus*  
484 *Res*. 2007;127(2):151-7. Epub 2007/03/03. doi: 10.1016/j.virusres.2007.01.005. PubMed PMID:  
485 17328982.
- 486 28. Dinc B, Koyuncu D, Karatayli SC, Berk E, Karatayli E, Parlak M, et al. Molecular characterization of  
487 hepatitis A virus isolated from acute infections in Turkey. *Turk J Gastroenterol*. 2012;23(6):714-9. Epub  
488 2013/06/26. PubMed PMID: 23794310.
- 489 29. Wang H, Zheng H, Cao J, Zhou W, Yi Y, Jia Z, et al. Genetic diversity of hepatitis A virus in China:  
490 VP3-VP1-2A genes and evidence of quasispecies distribution in the isolates. *PLoS One*.  
491 2013;8(9):e74752. Epub 2013/09/27. doi: 10.1371/journal.pone.0074752. PubMed PMID: 24069343;  
492 PubMed Central PMCID: PMCPMC3775754.

- 493 30. Bruni R, Taffon S, Equestre M, Cella E, Lo Presti A, Costantino A, et al. Hepatitis a virus genotypes  
494 and strains from an endemic area of Europe, Bulgaria 2012-2014. *BMC Infect Dis.* 2017;17(1):497. Epub  
495 2017/07/15. doi: 10.1186/s12879-017-2596-1. PubMed PMID: 28705178; PubMed Central PMCID:  
496 PMC5513050.
- 497 31. Hayajneh WA, Balbeesi A, Faouri S. Hepatitis A virus age-specific sero-prevalence and risk factors  
498 among Jordanian children. *Journal of medical virology.* 2015;87(4):569-74. Epub 2015/02/05. doi:  
499 10.1002/jmv.24137. PubMed PMID: 25648328.
- 500 32. Toukan AU, Sharaiha ZK, Abu-el-Rob OA, Hmoud MK, Dahbour SS, Abu-Hassan H, et al. The  
501 seroepidemiology of hepatitis A virus infection in Jordan. *Trop Gastroenterol.* 1988;9(2):76-9. Epub  
502 1988/04/01. PubMed PMID: 3262944.
- 503 33. Battikhi MN, Battikhi EG. The seroepidemiology of Hepatitis A virus in Amman, Jordan. *The new  
504 microbiologica.* 2004;27(3):215-20. Epub 2004/10/06. PubMed PMID: 15460523.
- 505 34. Juniasuti, Wahyuddin D, Nihayatussa'adah, Amin M, Yamani LN, Utsumi T, et al. Analysis of  
506 genetic and serology of hepatitis A virus infection during and after outbreak in two junior high schools in  
507 Surabaya, Indonesia. *Journal of medical virology.* 2019;91(6):1048-55. Epub 2019/01/20. doi:  
508 10.1002/jmv.25403. PubMed PMID: 30659645.
- 509 35. Kotwal A, Singh H, Verma AK, Gupta RM, Jain S, Sinha S, et al. A study of Hepatitis A and E virus  
510 seropositivity profile amongst young healthy adults in India. *Med J Armed Forces India.* 2014;70(3):225-  
511 9. Epub 2014/11/08. doi: 10.1016/j.mjafi.2014.06.016. PubMed PMID: 25378774; PubMed Central  
512 PMCID: PMC4213908.
- 513 36. Pinheiro RS, Araujo LA, Caetano KA, Matos MA, Carneiro MA, Teles SA. Intermediate Endemicity  
514 of Hepatitis a Virus Infection in Rural Settlement Projects of Southwest Goias, Brazil. *Arq Gastroenterol.*  
515 2015;52(3):200-3. Epub 2015/10/22. doi: 10.1590/S0004-28032015000300009. PubMed PMID:  
516 26486287.
- 517 37. de Almeida LM, Amaku M, Azevedo RS, Cairncross S, Massad E. The intensity of transmission of  
518 hepatitis A and heterogeneities in socio-environmental risk factors in Rio de Janeiro, Brazil. *Transactions  
519 of the Royal Society of Tropical Medicine and Hygiene.* 2002;96(6):605-10. Epub 2003/03/11. doi:  
520 10.1016/s0035-9203(02)90325-1. PubMed PMID: 12625132.

521



bioRxiv preprint doi: <https://doi.org/10.1101/2020.09.25.313015>; this version posted September 25, 2020. The copyright holder for this preprint (which was not certified by peer review) is the author/funder, who has granted bioRxiv a license to display the preprint in perpetuity. It is made available under aCC-BY 4.0 International license.

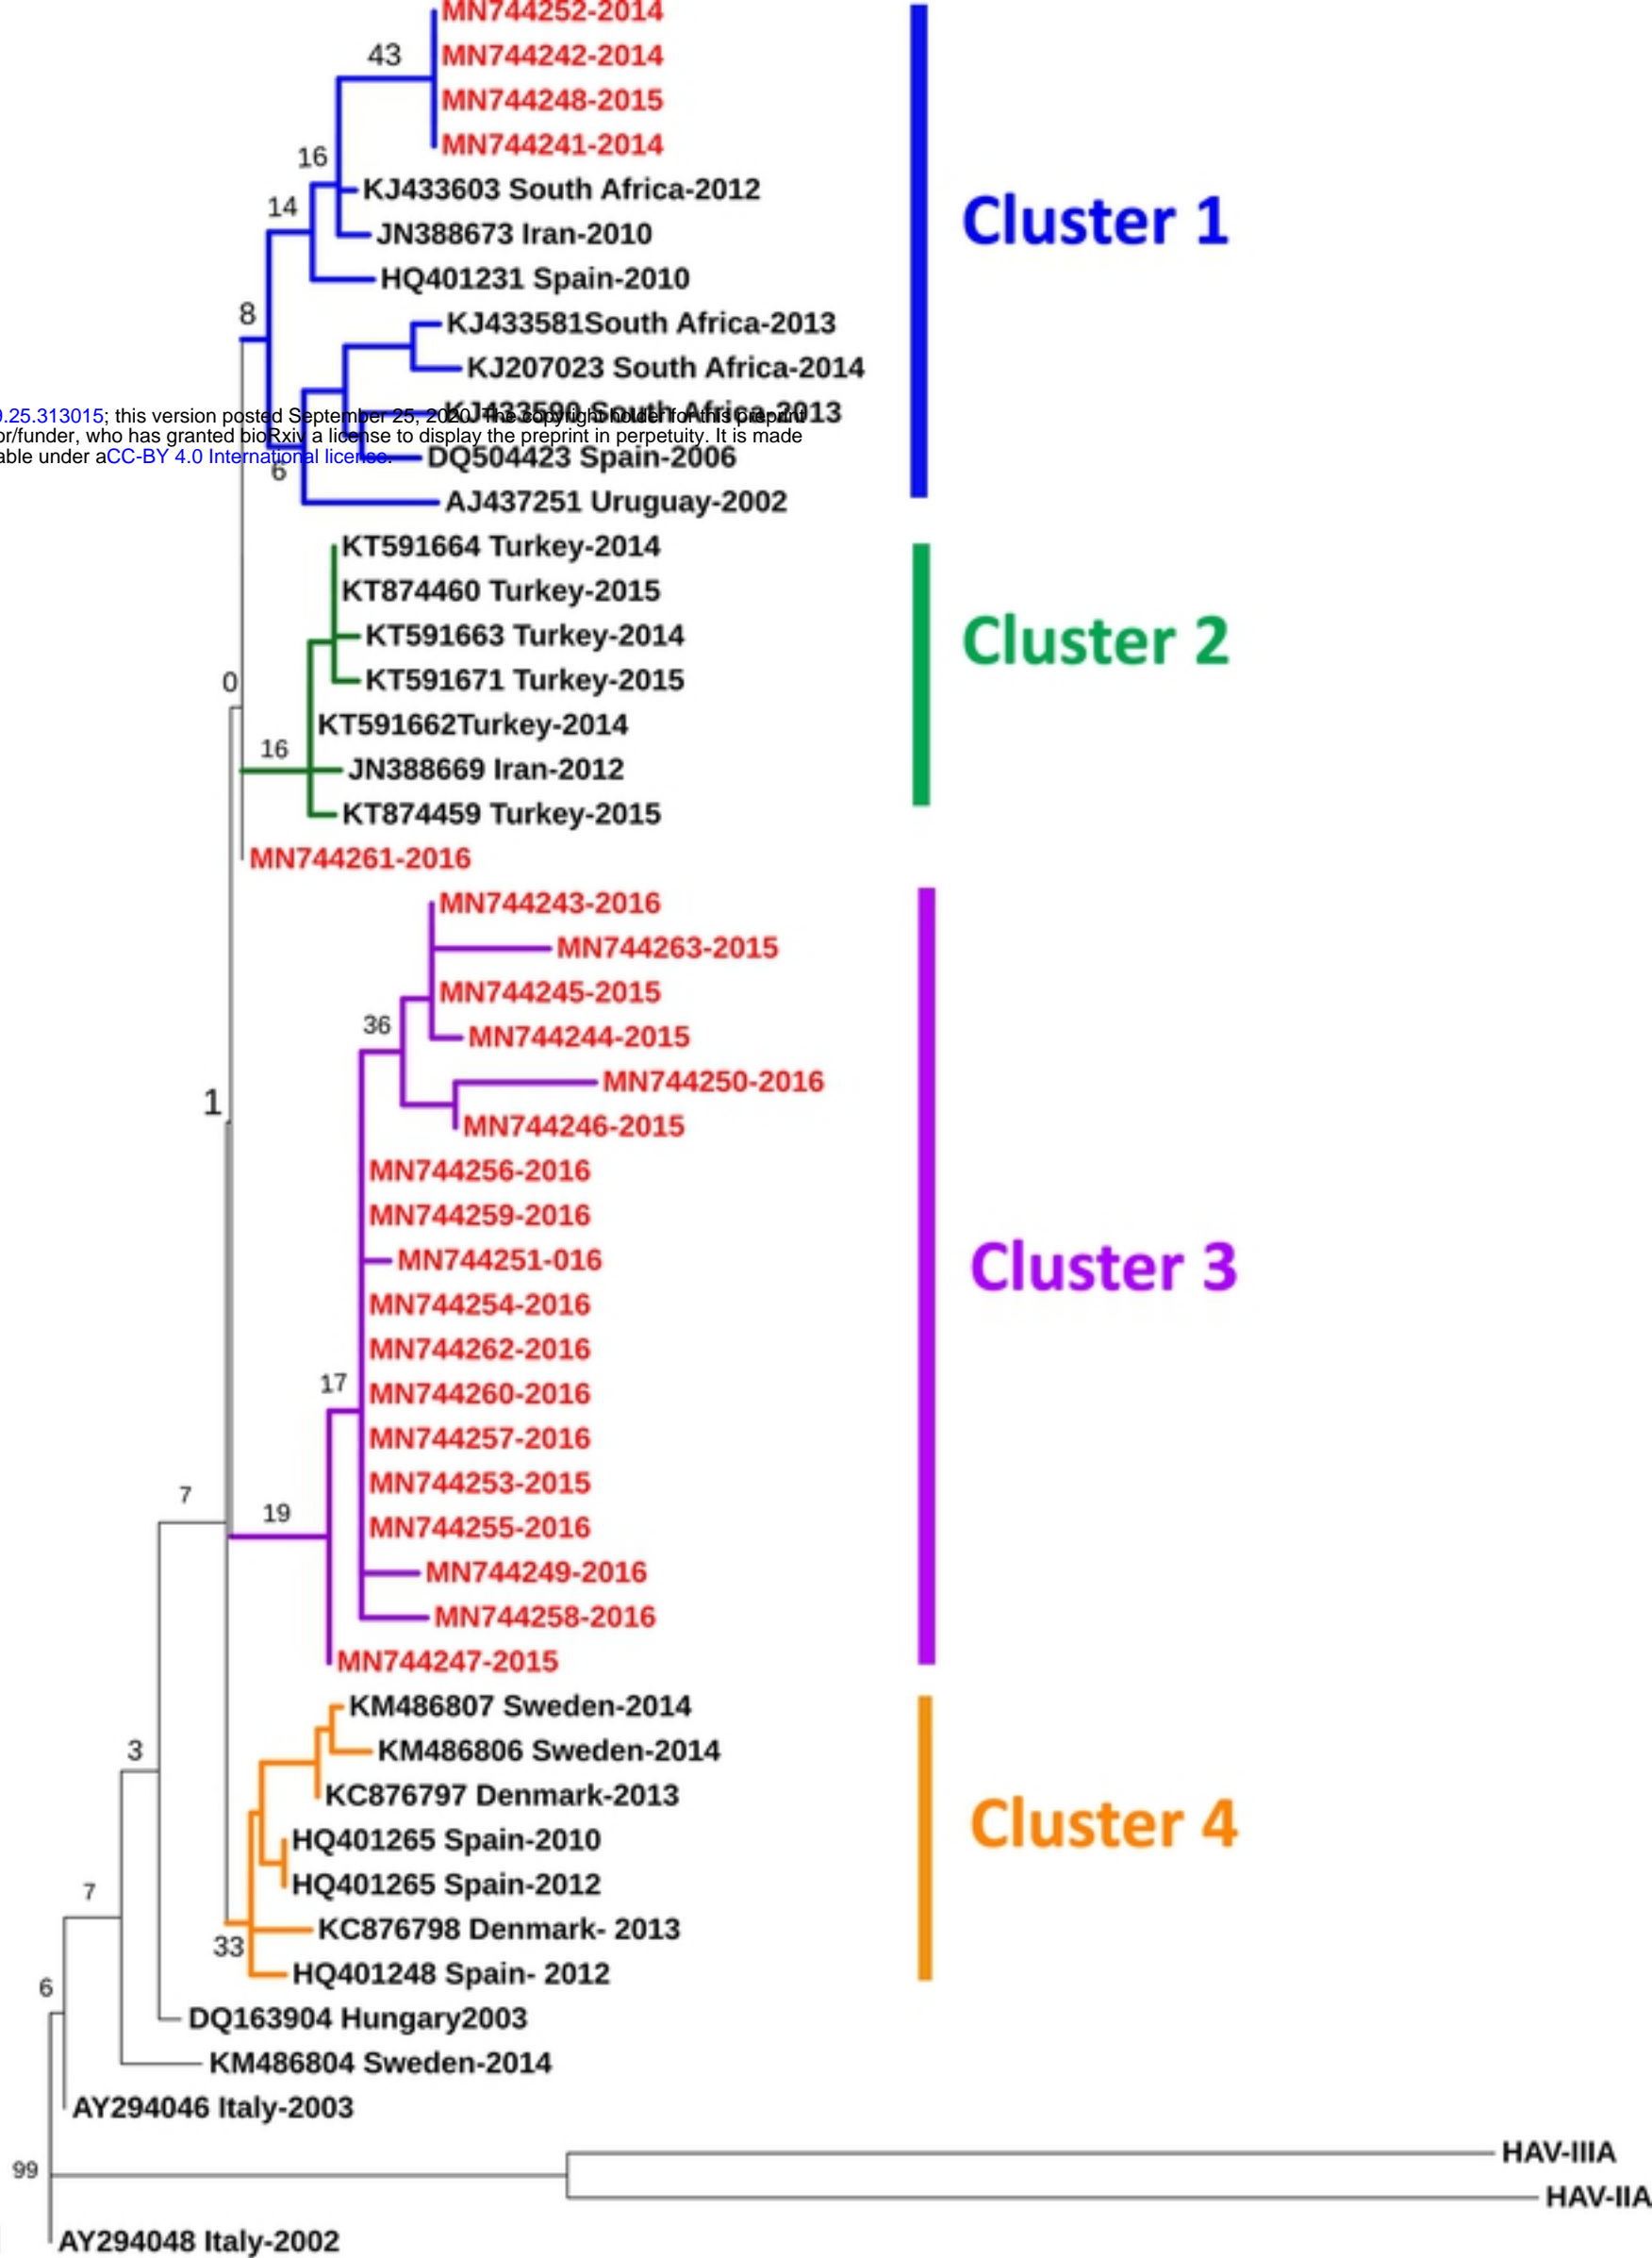

Tree scale: 0.01

Figure

- Palestine (n=23)
- Turkey (n=6)
- Spain (n= 4)
- Iran (n=3)
- South Africa (n=4)
- Uruguay (n=1)
- Sweden (n=4)
- Denmark (n=2)
- Hungary (n=1)
- Italy (n=2)

bioRxiv preprint doi: <https://doi.org/10.1101/2020.09.25.313015>; this version posted September 25, 2020. The copyright holder for this preprint (which was not certified by peer review) is the author/funder, who has granted bioRxiv a license to display the preprint in perpetuity. It is made available under a [CC-BY 4.0 International license](#).

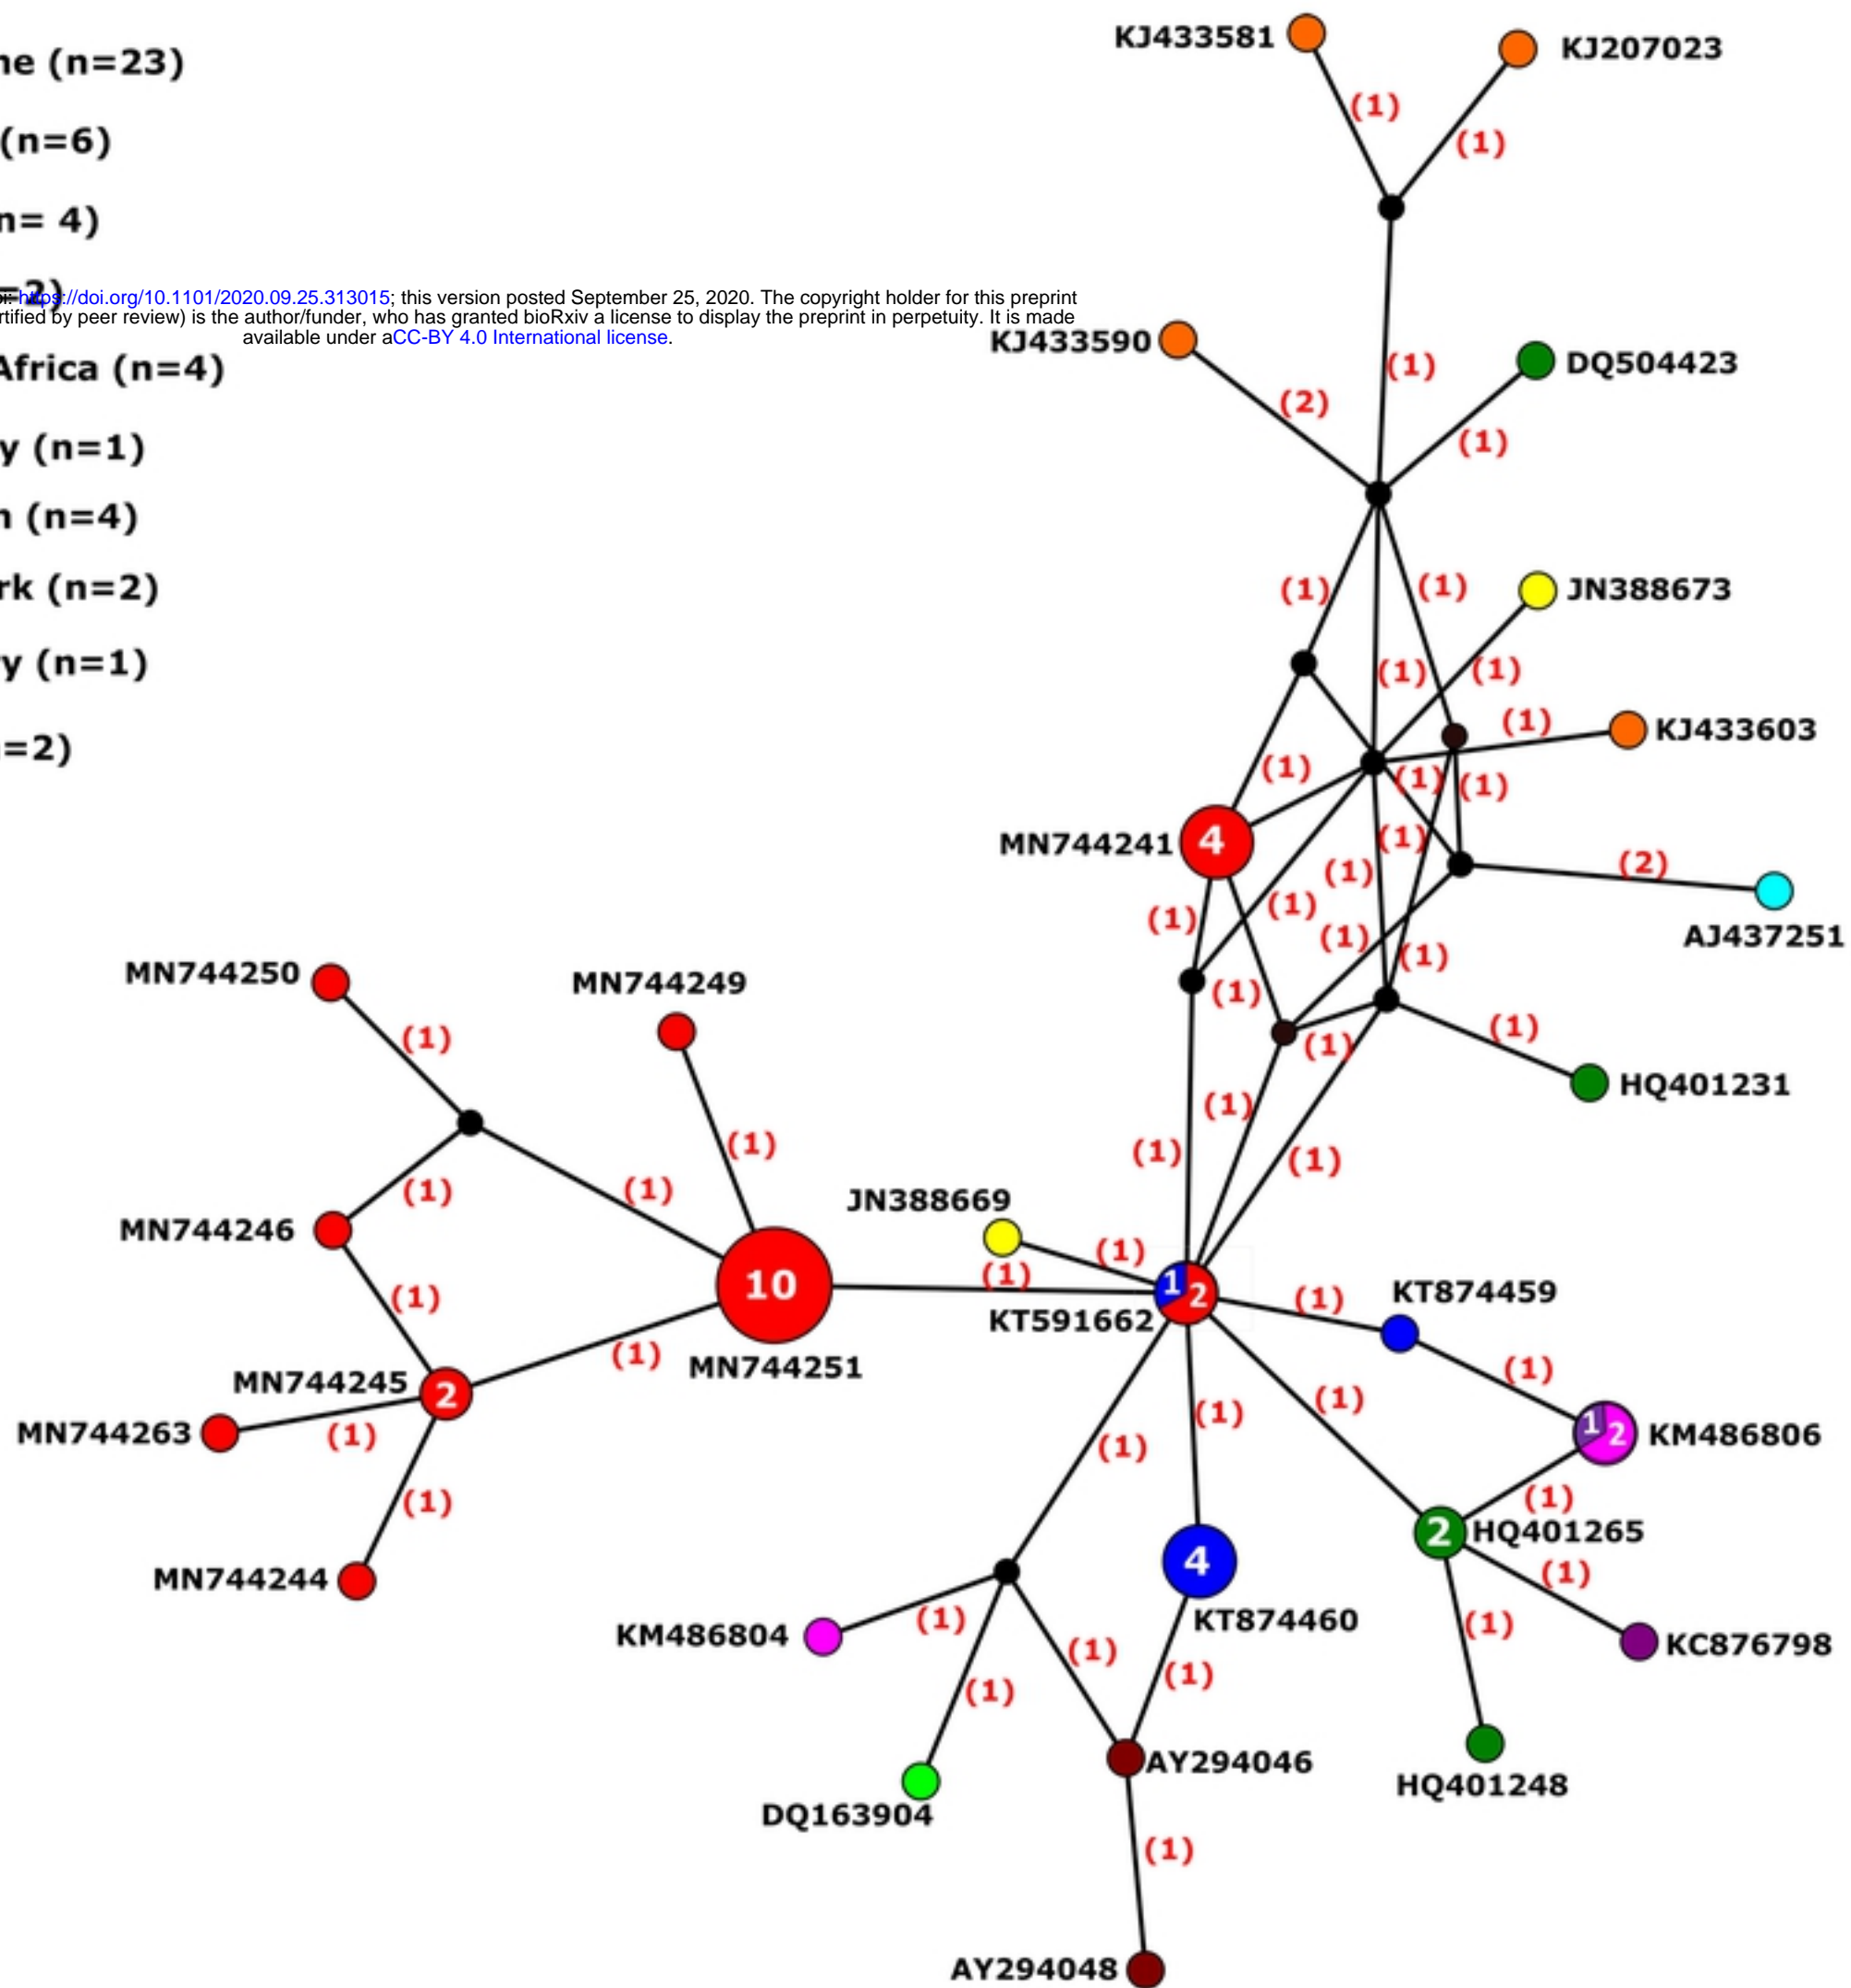

Figure



bioRxiv preprint doi: <https://doi.org/10.1101/2020.09.25.313015>; this version posted September 25, 2020. The copyright holder for this preprint (which was not certified by peer review) is the author/funder, who has granted bioRxiv a license to display the preprint in perpetuity. It is made available under aCC-BY 4.0 International license.

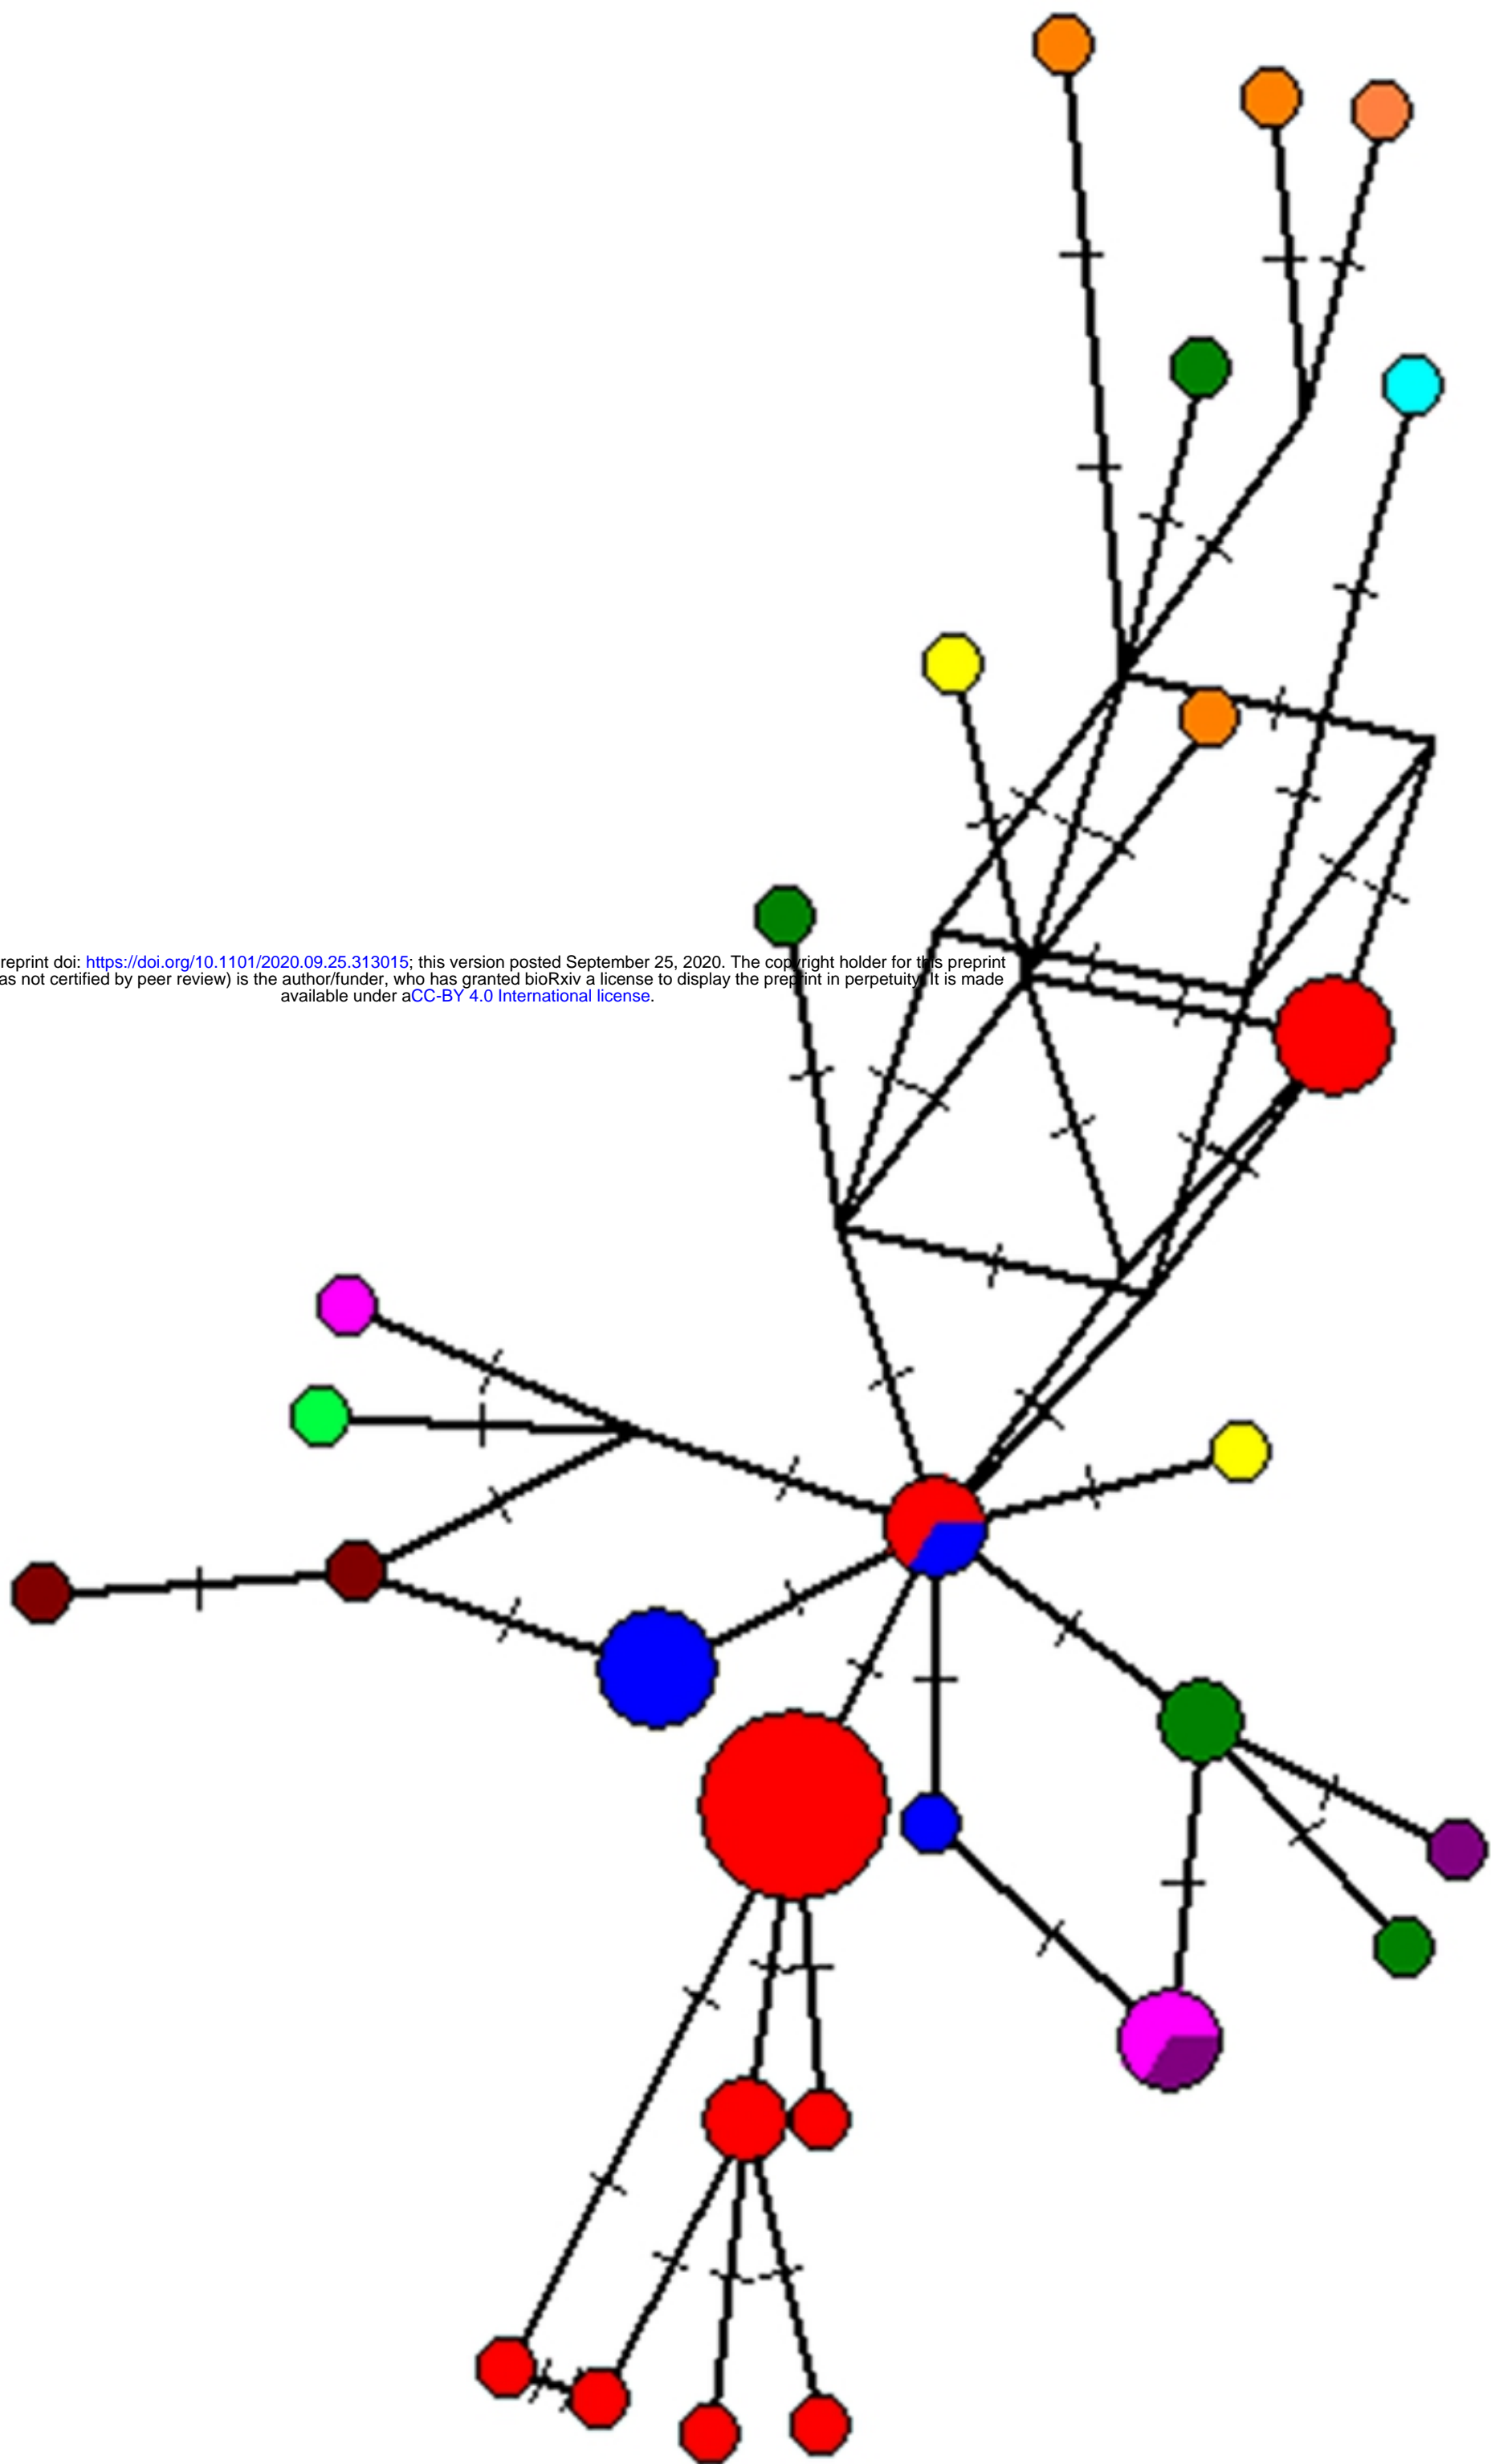

Figure
